# Supplementary material
Source: HighWire-hosted journal article supplement (https://bmjopen.bmj.com/content/10/6/e036089)
Supplement: inline-supplementary-material-3 [file inline-supplementary-material-3.pdf]

## Does exercise-based cardiac rehabilitation improve quality of life in coronary artery disease? A contemporary systematic review and meta-analysis

### Supplementary appendix 3. Summary of health-related quality of life for trials not meta-analysed

#### Short-term follow-up (0-6 months)

| Measure of HRQL                                          | Mean (SD) outcome values at follow-up |                   | P     | Between groups difference       |
|----------------------------------------------------------|---------------------------------------|-------------------|-------|---------------------------------|
|                                                          | <i>Exercise</i>                       | <i>Usual Care</i> |       |                                 |
| <b>Belardinelli 2001</b>                                 |                                       |                   |       |                                 |
| <b>MOS short-form (20 item) at 6-month follow-up:</b>    |                                       |                   |       |                                 |
| Physical function                                        | 78 (19)                               | 55 (20)           | 0.001 | <b>Exercise &gt; Usual care</b> |
| Role physical                                            | 75 (13)                               | 65 (14)           | 0.01  | <b>Exercise &gt; Usual care</b> |
| Bodily pain                                              | 4 (9)                                 | 22 (10)           | 0.001 | <b>Exercise &gt; Usual care</b> |
| General health                                           | 68 (14)                               | 50 (19)           | 0.001 | <b>Exercise &gt; Usual care</b> |
| Social function                                          | 66 (10)                               | 69 (12)           | NS    | Exercise = Usual care           |
| Mental health                                            | 65 (12)                               | 48 (15)           | 0.01  | <b>Exercise &gt; Usual care</b> |
| Total score                                              | 348 (77)                              | 265 (90)          | 0.01  | <b>Exercise &gt; Usual care</b> |
| <b>Duke Activity Index at 6-month follow-up:</b>         |                                       |                   |       |                                 |
| Score                                                    | 52 (10)                               | 45 (11)           | 0.001 | <b>Exercise &gt; Usual care</b> |
| <b>Briffa 2005</b>                                       |                                       |                   |       |                                 |
| <b>SF-36 at 6-month follow-up:</b>                       |                                       |                   |       |                                 |
|                                                          | <b>Δ (95% CI)</b>                     | <b>Δ (95% CI)</b> |       |                                 |
| Physical function                                        | 15.9 (−8 to 23)                       | 7.1 (1 to 13)     | NS    | Exercise = Usual care           |
| Role physical                                            | 75 (0 to 100)                         | 75 (0 to 100)     | NS    | Exercise = Usual care           |
| Bodily pain                                              | 26.6 (18 to 35)                       | 19.2 (11 to 27)   | NS    | Exercise = Usual care           |
| General health                                           | 0.1 (−6 to 6)                         | − 0.6 (−5 to 4)   | NS    | Exercise = Usual care           |
| Vitality                                                 | 7.1 (1 to 13)                         | 3.7 (−2 to 9)     | NS    | Exercise = Usual care           |
| Social function                                          | 19.6 (10 to 29)                       | 14.1 (7 to 21)    | NS    | Exercise = Usual care           |
| Role emotional                                           | 33.3 (0 to 100)                       | 33.3 (33 to 100)  | NS    | Exercise = Usual care           |
| Mental health                                            | 0.5 (−4 to 5)                         | 1.4 (−3 to 5)     | NS    | Exercise = Usual care           |
| <b>Devi 2014</b>                                         |                                       |                   |       |                                 |
| <b>Seattle Angina Questionnaire at 6-week follow-up:</b> |                                       |                   |       |                                 |
| Physical score                                           | 0.29 (−0.11 to 0.43) <sup>#</sup>     |                   | 0.24  | Exercise = Usual care           |
| Emotional score                                          | 0.46 (−0.02 to 0.62) <sup>#</sup>     |                   | 0.06  | Exercise = Usual care           |

**Houle 2012****Quality of Life Index-cardiac version III at 6-month follow-up:**

|                               |            |            |       |                                 |
|-------------------------------|------------|------------|-------|---------------------------------|
| Health and functional score   | 26 (5.1)   | 24.5 (5.3) | 0.048 | <b>Exercise &gt; Usual care</b> |
| Psychological/spiritual score | 25.6 (5.8) | 25.5 (3.8) | 0.383 | Exercise = Usual care           |
| Social and economic score     | 25.7 (3.8) | 25.4 (4.7) | 0.392 | Exercise = Usual care           |
| Family score                  | 28.1 (2.5) | 26.7 (4.3) | 0.048 | <b>Exercise &gt; Usual care</b> |
| Overall                       | 26.2 (4.3) | 25.8 (4.1) | 0.057 | Exercise = Usual care           |

**Sandstrom 2005****Time Trade Off (TTO) at 3-month follow-up:**

|             |             |    |                       |
|-------------|-------------|----|-----------------------|
| 0.84 (0.24) | 0.85 (0.21) | NS | Exercise = Usual care |
|-------------|-------------|----|-----------------------|

**EuroQol Part two at 3-month follow-up:**

|             |             |    |                       |
|-------------|-------------|----|-----------------------|
| 7.72 (1.61) | 7.51 (1.71) | NS | Exercise = Usual care |
|-------------|-------------|----|-----------------------|

**Santaularia 2017****EQ-5D at 3-month follow-up:**

|                    |             | n  | n  |       |                                 |
|--------------------|-------------|----|----|-------|---------------------------------|
| Mobility           | No problems | 34 | 37 | <0.05 | <b>Exercise &gt; Usual care</b> |
|                    | Problems    | 6  | 7  |       |                                 |
| Self-care          | No problems | 39 | 43 | NS    | Exercise = Usual care           |
|                    | Problems    | 1  | 1  |       |                                 |
| Usual activities   | No problems | 32 | 31 | NS    | Exercise = Usual care           |
|                    | Problems    | 8  | 13 |       |                                 |
| Pain/discomfort    | No problems | 29 | 26 | NS    | Exercise = Usual care           |
|                    | Problems    | 11 | 18 |       |                                 |
| Anxiety/depression | No problems | 26 | 22 | NS    | Exercise = Usual care           |
|                    | Problems    | 14 | 22 |       |                                 |

**Wang 2012****MIDAS at 3-month follow-up**

|                    |             |             |        |                                 |
|--------------------|-------------|-------------|--------|---------------------------------|
| Physical Activity  | 37.6 (11.3) | 43.5 (12.3) | <0.001 | <b>Exercise &gt; Usual care</b> |
| Insecurity         | 29.5 (10.6) | 33.9 (13.5) | <0.001 | <b>Exercise &gt; Usual care</b> |
| Emotional reaction | 31.9 (13.9) | 33.8 (15.4) | 0.008  | <b>Exercise &gt; Usual care</b> |
| Dependency         | 28.2 (10.6) | 33.6 (15.2) | 0.001  | <b>Exercise &gt; Usual care</b> |
| Diet               | 38.8 (16.0) | 42.6 (19.8) | 0.40   | Exercise = Usual care           |
| Concerns over med. | 31.6 (15.1) | 39.2 (19.7) | <0.001 | <b>Exercise &gt; Usual care</b> |
| Side Effects       | 31.9 (13.2) | 31.8 (15.8) | 0.30   | <b>Exercise &gt; Usual care</b> |

**MIDAS at 6-month follow-up**

|                    |             |             |        |                                 |
|--------------------|-------------|-------------|--------|---------------------------------|
| Physical Activity  | 37.7 (11.2) | 42.6 (12.3) | <0.001 | <b>Exercise &gt; Usual care</b> |
| Insecurity         | 28.7 (9.7)  | 33.4 (13.8) | <0.001 | <b>Exercise &gt; Usual care</b> |
| Emotional reaction | 30.4 (12.8) | 34.8 (14.4) | 0.008  | <b>Exercise &gt; Usual care</b> |
| Dependency         | 27.6 (9.4)  | 31.8 (16.6) | 0.001  | <b>Exercise &gt; Usual care</b> |
| Diet               | 36.8 (15.4) | 43.6 (20.7) | 0.40   | Exercise = Usual care           |
| Concerns over med. | 29.4 (12.6) | 37.7 (18.0) | <0.001 | <b>Exercise &gt; Usual care</b> |
| Side Effects       | 28.2 (11.1) | 30.8 (14.3) | 0.30   | <b>Exercise &gt; Usual care</b> |

**Medium-term follow-up (8-12 months)**

| Measure of HRQL | Mean (SD) outcome values at follow-up |                   | P | Between groups difference |
|-----------------|---------------------------------------|-------------------|---|---------------------------|
|                 | <i>Exercise</i>                       | <i>Usual Care</i> |   |                           |

**Belardinelli 2001****MOS short-form (20 item) at 12-month follow-up:**

|                   |          |          |       |                                 |
|-------------------|----------|----------|-------|---------------------------------|
| Physical function | 82 (18)  | 54 (20)  | 0.001 | <b>Exercise &gt; Usual care</b> |
| Role physical     | 76 (9)   | 58 (14)  | 0.01  | <b>Exercise &gt; Usual care</b> |
| Bodily pain       | 4 (9)    | 32 (12)  | 0.001 | <b>Exercise &gt; Usual care</b> |
| General health    | 70 (14)  | 50 (18)  | 0.001 | <b>Exercise &gt; Usual care</b> |
| Social function   | 68 (11)  | 68 (12)  | NS    | Exercise = Usual care           |
| Mental health     | 70 (14)  | 45 (15)  | 0.001 | <b>Exercise &gt; Usual care</b> |
| Total score       | 362 (75) | 242 (91) | 0.001 | <b>Exercise &gt; Usual care</b> |

**Duke Activity Index at 12-month follow-up:**

|       |         |         |       |                                 |
|-------|---------|---------|-------|---------------------------------|
| Score | 53 (12) | 35 (13) | 0.001 | <b>Exercise &gt; Usual care</b> |
|-------|---------|---------|-------|---------------------------------|

**Briffa 2005****SF-36 at 1-year follow-up:**

|                   |                  |                  |      |                                 |
|-------------------|------------------|------------------|------|---------------------------------|
| Physical function | 17.6 (10 to 25)  | 6.8 (-1 to 14)   | 0.04 | <b>Exercise &gt; Usual care</b> |
| Role physical     | 100 (0 to 100)   | 75 (12 to 30)    | NS   | Exercise = Usual care           |
| Bodily pain       | 30.2 (23 to 37)  | 20.9 (-2 to 7)   | NS   | Exercise = Usual care           |
| General health    | 2.7 (-3 to 5)    | 2.2 (-2 to 7)    | NS   | Exercise = Usual care           |
| Vitality          | 11.9 (6 to 18)   | 6.9 (1 to 12)    | NS   | Exercise = Usual care           |
| Social function   | 23.6 (14 to 33)  | 16.4 (9 to 23)   | NS   | Exercise = Usual care           |
| Role emotional    | 33.3 (33 to 100) | 33.3 (33 to 100) | NS   | Exercise = Usual care           |
| Mental health     | 3.6 (-1 to 9)    | 3.9 (0 to 8)     | NS   | Exercise = Usual care           |

**Hautala 2016****15 D instrument at 12-month follow-up:**

|               | $\Delta$ mean | $\Delta$ mean |    |                       |
|---------------|---------------|---------------|----|-----------------------|
| Utility score | -0.008        | -0.020        | NS | Exercise = Usual care |

**Houle 2012****Quality of Life Index-cardiac version III at 12-month follow-up:**

|                               |            |            |       |                                 |
|-------------------------------|------------|------------|-------|---------------------------------|
| Health and functional score   | 27.8 (2.0) | 25.3 (4.6) | 0.036 | <b>Exercise &gt; Usual care</b> |
| Psychological/spiritual score | 27.4 (2.5) | 26.2 (4.0) | 0.336 | Exercise = Usual care           |
| Social and economic score     | 27.2 (3.0) | 25.9 (5.2) | 0.638 | Exercise = Usual care           |
| Family score                  | 28.0 (2.6) | 26.8 (5.0) | 0.092 | Exercise = Usual care           |
| Overall                       | 27.7 (2.1) | 25.7 (4.2) | 0.048 | <b>Exercise &gt; Usual care</b> |

**Reid 2012****MacNew at 12-month follow-up:**

|                    |           |           |       |                                 |
|--------------------|-----------|-----------|-------|---------------------------------|
| Global score       | 5.8 (0.6) | 5.6 (0.8) | NS    | Exercise = Usual care           |
| Emotional subscale | 5.6 (0.6) | 5.4 (0.7) | <0.05 | <b>Exercise &gt; Usual care</b> |
| Social subscale    | 6.3 (0.8) | 6.0 (1.0) | NS    | Exercise = Usual care           |
| Physical subscale  | 6.0 (0.8) | 5.8 (1.0) | <0.05 | <b>Exercise &gt; Usual care</b> |

**Sandstrom 2005****Time Trade Off (TTO) at 12-month follow-up:**

|             |             |    |                       |
|-------------|-------------|----|-----------------------|
| 0.86 (0.23) | 0.85 (0.21) | NS | Exercise = Usual care |
|-------------|-------------|----|-----------------------|

**EuroQol Part one at 12-month follow-up:**

|             |             |    |                       |
|-------------|-------------|----|-----------------------|
| 0.87 (0.15) | 0.86 (0.16) | NS | Exercise = Usual care |
|-------------|-------------|----|-----------------------|

**EuroQol Part two at 12-month follow-up:**

|            |             |    |                       |
|------------|-------------|----|-----------------------|
| 7.6 (1.46) | 7.43 (1.46) | NS | Exercise = Usual care |
|------------|-------------|----|-----------------------|

**Salavati 2015****Macnew at 2-month follow-up**

All reported values exceed measurable range of instrument

**Santaularia 2017****EQ-5D at 12-month follow-up:**

|           |             |    |    |       |                                 |
|-----------|-------------|----|----|-------|---------------------------------|
| Mobility  | No problems | 33 | 33 | <0.05 | <b>Exercise &gt; Usual care</b> |
|           | Problems    | 6  | 11 |       |                                 |
| Self-care | No problems | 38 | 43 | NS    | Exercise = Usual care           |

|                    |             |    |    |    |                       |
|--------------------|-------------|----|----|----|-----------------------|
|                    | Problems    | 1  | 1  |    |                       |
| Usual activities   | No problems | 32 | 31 | NS | Exercise = Usual care |
|                    | Problems    | 7  | 13 |    |                       |
| Pain/discomfort    | No problems | 28 | 26 | NS | Exercise = Usual care |
|                    | Problems    | 11 | 18 |    |                       |
| Anxiety/depression | No problems | 22 | 26 | NS | Exercise = Usual care |
|                    | Problems    | 17 | 18 |    |                       |

NS, not significant; med, medication

# between groups difference reported

Exercise = Usual care, no statistically significant difference ( $P > 0.05$ ) between exercise and usual care groups at follow-up

Exercise > Usual care: statistically significant difference ( $P < 0.05$ ) between exercise and usual care groups at follow-up
