# Supplementary material
Source: HighWire-hosted journal article supplement (https://bmjopen.bmj.com/content/10/6/e036089)
Supplement: inline-supplementary-material-4 [file inline-supplementary-material-4.pdf]

## Does exercise-based cardiac rehabilitation improve quality of life in coronary artery disease? A contemporary systematic review and meta-analysis

### Supplementary appendix 4: Risk of Bias Assessment

|                    | Randomization process | Deviations from intended interventions | Missing outcome data | Measurement of the outcome | Selection of the reported result | Overall Bias |
|--------------------|-----------------------|----------------------------------------|----------------------|----------------------------|----------------------------------|--------------|
| <b>Asbury</b>      | low                   | high                                   | low                  | low                        | high                             | high         |
| <b>Bettencourt</b> | high                  | low                                    | low                  | low                        | low                              | high         |
| <b>Chen</b>        | some concern          | low                                    | high                 | high                       | low                              | high         |
| <b>Devi</b>        | low                   | low                                    | low                  | some concern               | low                              | some concern |
| <b>Firouzabadi</b> | some concern          | high                                   | some concern         | some concern               | low                              | high         |
| <b>Hassan</b>      | some concern          | some concern                           | low                  | some concern               | low                              | some concern |
| <b>Hojskov 15</b>  | low                   | some concern                           | low                  | low                        | low                              | some concern |
| <b>Hojskov 19</b>  | low                   | low                                    | low                  | low                        | low                              | low          |
| <b>Maddison</b>    | low                   | low                                    | low                  | low                        | low                              | low          |
| <b>Mutawalli</b>   | some concern          | high                                   | high                 | some concern               | low                              | high         |
| <b>Oerkild</b>     | low                   | low                                    | low                  | some concern               | low                              | some concern |
| <b>Peixoto</b>     | low                   | some concern                           | low                  | low                        | low                              | some concern |
| <b>Reid</b>        | low                   | low                                    | high                 | low                        | low                              | high         |
| <b>Sandstrom</b>   | some concern          | low                                    | low                  | low                        | low                              | some concern |
| <b>Wang</b>        | some concern          | low                                    | low                  | some concern               | low                              | some concern |
| <b>West</b>        | some concern          | some concern                           | low                  | low                        | low                              | some concern |
| <b>Yu</b>          | some concern          | high                                   | high                 | some concern               | low                              | high         |
| <b>Zwisler</b>     | low                   | some concern                           | low                  | low                        | low                              | some concern |
