# Supplementary material
Source: HighWire-hosted journal article supplement (https://bmjopen.bmj.com/content/10/6/e036089)

Does exercise-based cardiac rehabilitation improve quality of life in coronary artery disease? A contemporary systematic review and meta-analysis

Supplementary appendix 6: Meta-analysis for Mortality (Excludes West 2012)

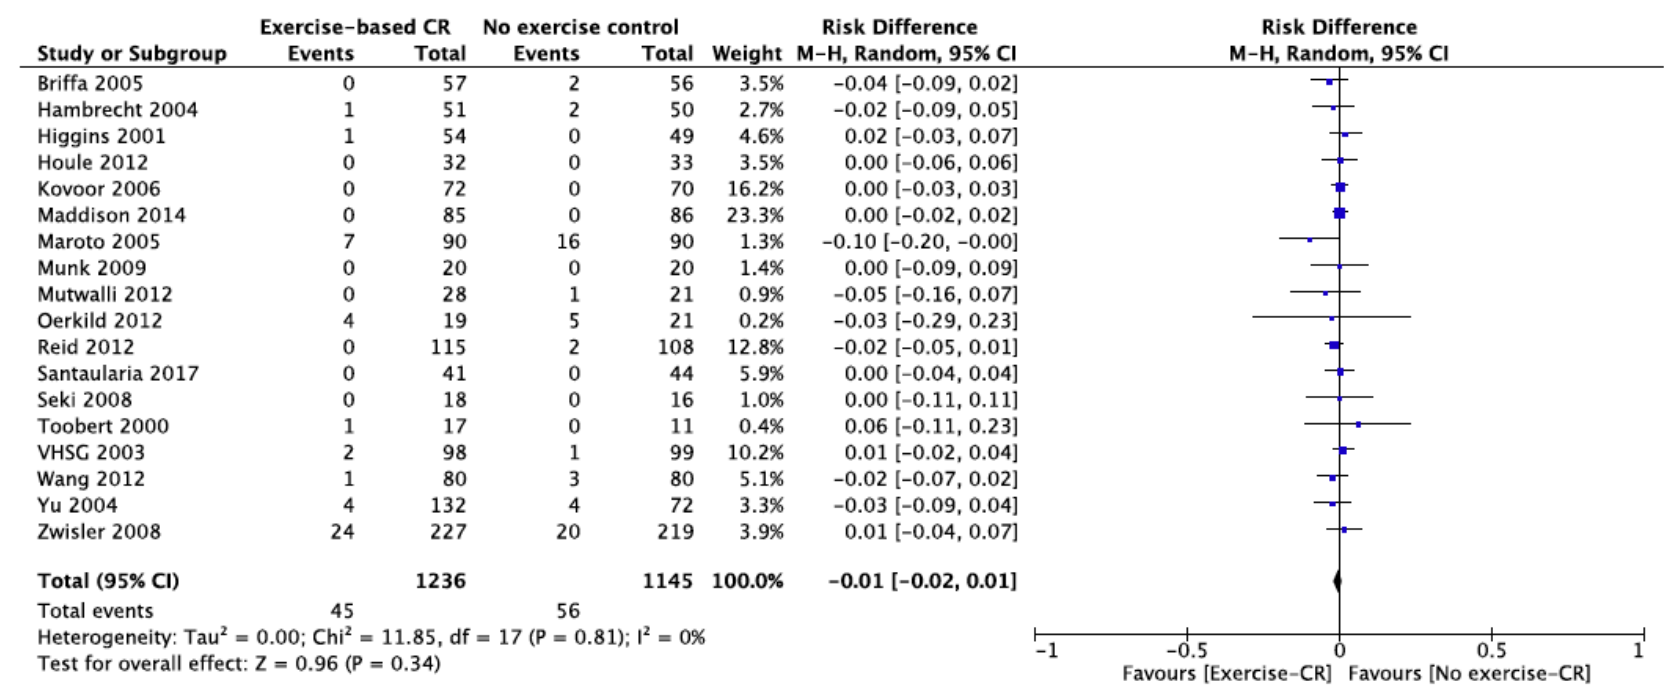

Supplement: inline-supplementary-material-6 [file inline-supplementary-material-6.pdf]
